# Supplementary material for: FLI1 and FRA1 transcription factors drive the transcriptional regulatory networks characterizing muscle invasive bladder cancer
Source: PubMed Central journal article supplement (PMC9941102; doi:10.1038/s42003-023-04561-3), 2023-02-20
Supplement: 42003_2023_4561_MOESM2_ESM.pdf [file 42003_2023_4561_MOESM2_ESM.pdf]

## Description of Additional Supplementary Files

**File name:**Supplementary Data 1

**Description:** MIBC enhancers and their target genes.

**File name:**Supplementary Data 2

**Description:** NMIBC enhancers and their target genes.

**File name:**Supplementary Data 3

**Description:** Complete results of ClusterProfiler GO Term analysis for the target genes of MIBC enhancers.

**File name:**Supplementary Data 4

**Description:** List of transcription factors identified in target genes of NMIBC enhancers.

**File name:**Supplementary Data 5

**Description:** List of proteins identified to be interacting with FRA1 in T24 cell line according to CHIP-SICAP results.

**File name:**Supplementary Data 6

**Description:** List of proteins identified to be interacting with FLI1 in T24 cell line according to CHIP-SICAP results.

**File name:**Supplementary Data 7

**Description:** Overlapped Protein Interactors of FLI1 & FRA1 Transcription Factors.

**File name:**Supplementary Data 8

**Description:** Primers used in RT-qPCR experiments.

**File name:**Supplementary Data 9

**Description:** Source data of main figures' graphs.
